# Supplementary material for: Reversible writing/deleting of magnetic skyrmions through hydrogen adsorption/desorption
Source: Research Square preprint supplement (doi:10.21203/rs.3.rs-575830/v1), 2021-06-23
Supplement: Supplementary file 1 [file 9ccbbb055c7b0e0c208a0225.docx]

**Reversible writing/deleting of magnetic skyrmions through hydrogen adsorption/desorption**

Gong Chen1,2*, Colin Ophus3, Alberto Quintana1, Heeyoung Kwon4, Changyeon Won5, Haifeng Ding6, Yizheng Wu7, Andreas K. Schmid3, Kai Liu1,2*

1 Physics Department, Georgetown University, Washington, DC 20057, USA

2 Physics Department, University of California, Davis, California 95616, USA

3 NCEM, Molecular Foundry, Lawrence Berkeley National Laboratory, Berkeley, California, 94720 USA

4 Center for Spintronics, Korea Institute of Science and Technology, Seoul 02792, South Korea

5 Department of Physics, Kyung Hee University, Seoul 02447, South Korea

6 National Laboratory of Solid State Microstructures, Department of Physics and Collaborative Innovation Center of Advanced Microstructures, Nanjing University, 22 Hankou Road, Nanjing 210093, People’s Republic of China

7 Department of Physics, State Key Laboratory of Surface Physics and Advanced Materials Laboratory, Fudan University, Shanghai 200433, China

* Correspondence should be addressed to gchenncem@gmail.com (G.C.); Kai.Liu@georgetown.edu (K.L.)


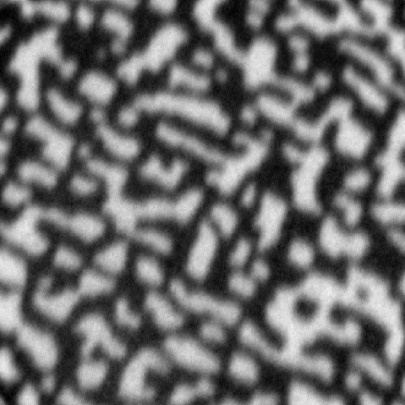


**Figure S1**. SPLEEM image with out-of-plane sensitivity of 24ML Ni/2ML Fe/1ML Ni/Cu(001), showing bubble-like domain pattern in the absence of magnetic field. The field of view is 7 μm.


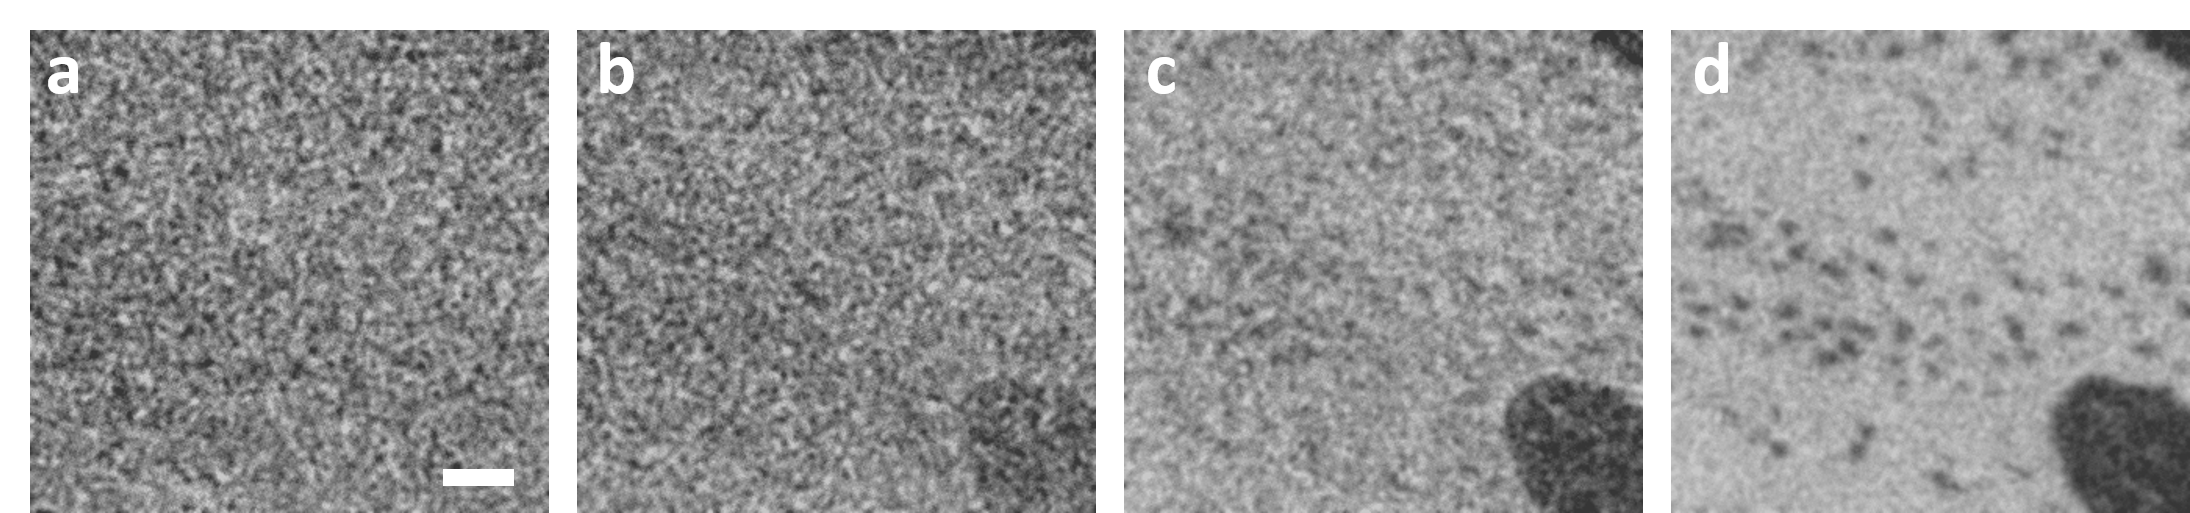


**Figure S2**. SPLEEM images with out-of-plane sensitivity as a function of Ni thickness *d*Ni in Ni/3ML Co/5ML Pd/W(110), showing the evolution of out-of-plane magnetized domains during the SRT. (a) *d*Ni = 0 ML, (b) *d*Ni = 0.20 ML, (c) *d*Ni = 0.27 ML, (d) *d*Ni = 0.31 ML. Scale bar 1μm.


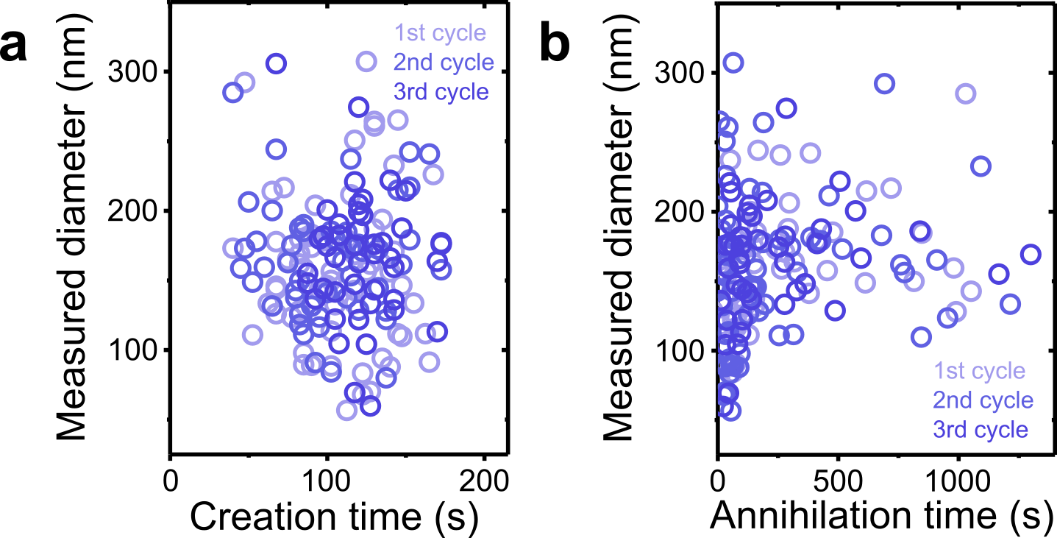


**Figure S3**. Relations between skyrmion diameter and the time required for skyrmion creation (panel a) and annihilation (panel b) over three cycles. The creation/annihilation time is counted from the instant when the hydrogen valve is turned ON/OFF until the moment each skyrmion appears/disappears.
